# Supplementary material
Source: publisher figshare collection journal article supplement (https://adisjournals.figshare.com/articles/dataset/_/6015698)
Supplement: Supplementary file 1 [file 1]

## Defining the Risk and Associated Morbidity and Mortality of Severe Respiratory Syncytial Virus Infection Among Infants with Congenital Heart Disease

Paul A. Checchia • Bosco Paes • Louis Bont • Paolo Manzoni • Eric A. F. Simões • Brigitte Fauroux • Josep Figueras-Aloy • Xavier Carbonell-Estrany

Infect Dis Ther. 2017 Mar;6(1):37-56

This slide deck represents the opinions of the authors. Sponsorship for this project was funded by AbbVie. Medical writing assistance for this study was provided by Strategen Ltd. For a full list of acknowledgments and conflicts of interest for all authors of this article, please see the full text online. Copyright © The Authors 2018. Creative Commons Attribution Noncommercial License (CC BY-NC).

## Abbreviations

- CHD: Congenital heart disease
- HS-CHD: Hemodynamically significant congenital heart disease
- ICU: Intensive care unit
- LOS: Length of stay
- MV: Mechanical ventilation
- RSV: Respiratory syncytial virus
- RSVH: Respiratory syncytial virus hospitalization
- SOE: Strength of evidence

## REGAL 4: Associated morbidity and mortality of RSV in infants with CHD

- The methodology followed that of the predetermined protocol outlined in REGAL 1. The target population consisted of:
  - infants and young children with CHD/HS-CHD
- Short-term outcomes of interest for this review included:
  - RSVH
  - Hospital LOS
  - ICU admission and LOS
  - Oxygen requirement
  - Need for and duration of MV and/or non-invasive ventilation
  - Case-fatality rates

**‘What is the predisposition and associated morbidity, long-term sequelae and mortality of infants and young children with CHD following severe RSV infection?’**

## Defining CHD

- The following definition was proposed as a useful classification for future studies of CHD in relation to RSV

HS-CHD in relation to RSV was defined as:

- Uncorrected or palliated cyanotic or acyanotic CHD with pulmonary hypertension
- Systolic pulmonary arterial pressure  $\geq 40$  mmHg or mean pulmonary arterial pressure  $\geq 25$  mmHg, and/or
- Need for medication to manage congestive heart failure

## Systematic review

- 1,325 studies\* were identified of which 38 were included

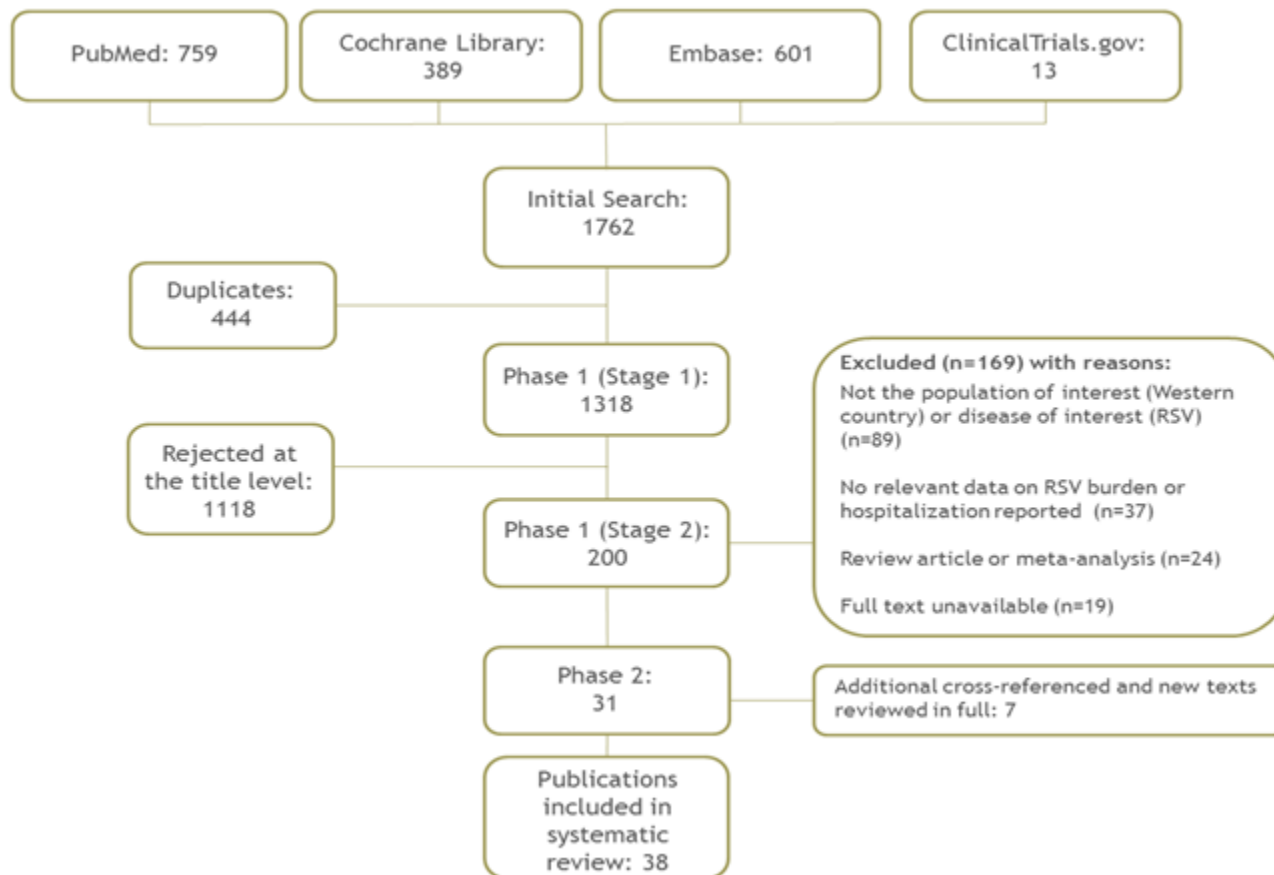

\*1,318 studies from the literature search (excluding duplicates) plus 7 additional cross-references

## Infants with CHD were at greater risk of RSVH than term infants (high SOE)

RSVH rates ranged from

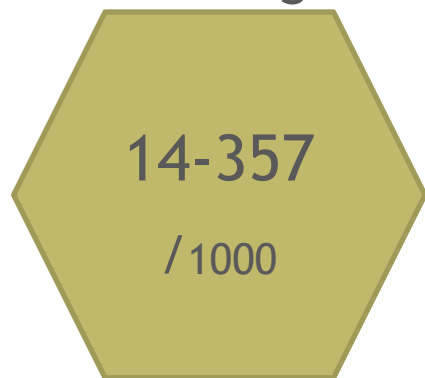

for infants with CHD

- Several studies reported a **higher RSVH rate** in infants with CHD aged **<12 months**
- Multivariate analyses reported **CHD** as an **independent risk factor** for RSVH
- Verification of **non-HS-CHD** as an independently significant **risk factor** for RSVH in **non-premature populations** is required

CHD, in particular HS-CHD, was a significant risk factor for severe RSV infection

RSVH in children with CHD was associated with considerable morbidity (high SOE)

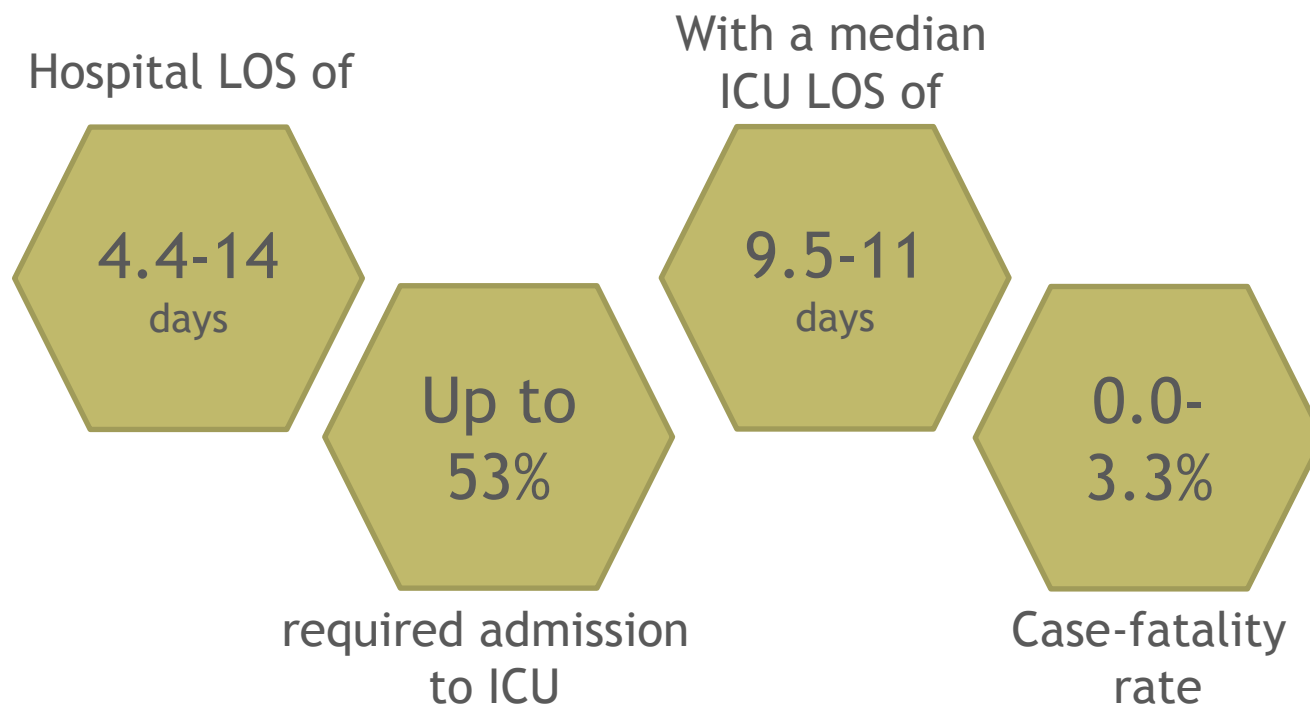

Children with CHD had a more severe course of RSV infection than children without CHD

## RSV infection may impact significantly on cardiac surgery for CHD (moderate SOE)

- Surgical outcomes in children with CHD have improved over the past two decades. However, RSV resulted in substantial morbidity and mortality in children with CHD undergoing cardiac surgery
- Nosocomial RSV infection in the ICU was also an important cause of morbidity in this population
- RSV infection resulted in:
  - Delayed cardiac surgery and postoperative complications
  - Longer duration of heart failure medication
  - Prolonged hospital LOS and increased time spent in ICU

RSV infection was identified as an important consideration for the timing of surgery for CHD



## Concluding statements

| Key Findings                                                                                                                                                | Level of Evidence |
|-------------------------------------------------------------------------------------------------------------------------------------------------------------|-------------------|
| CHD, in particular HS-CHD, is a significant risk factor for severe RSV infection with RSVH rates ranging from 14-357 per 1000                               | 1                 |
| Children with CHD spend an average of 4.4-14 days in hospital for RSV infection, with up to 53% requiring admission to the ICU                              | 1                 |
| Children with CHD have a more severe disease course (increased ICU admission and ventilation) than children without CHD                                     | 1                 |
| RSV infection can delay and impact surgery for CHD and increase post-operative complications, such that the timing of surgery is an important consideration | 2                 |
| Case fatality rates associated with RSVH in children with CHD are reported to range from 0-3.3%                                                             | 1                 |

Infants and children with CHD are at high risk for severe RSV infection, particularly in the first year of life

## Further development

- Key areas for research:
  - Studies to determine the longer-term effects of severe RSV infection in infants and young children with CHD or HS-CHD
  - Assessment of RSV outcomes related to CHD and HS-CHD in children, independent of chromosomal/non-chromosomal anomalies and other serious pre-existing medical disorders
- An understanding of the relationship between RSV and CHD will help reduce the burden and improve outcomes in this patient population

## Acknowledgments

- Sponsorship and article processing charges for this study were funded by AbbVie. Dr Joanne Smith, Julie Blake and Dr Barry Rodgers-Gray, from Strategen Limited, undertook the systematic review following protocol approval by the authors.
- Julie Blake and Dr Barry Rodgers-Gray provided editorial assistance in the preparation of this manuscript. Support for this assistance was funded by AbbVie.
- All named authors met the International Committee of Medical Journal Editors (ICMJE) criteria for authorship for this manuscript, took responsibility for the integrity of the work as a whole, and gave final approval for the published version of the manuscript.

## Disclosures

The institute of Louis Bont received money for investigator-initiated studies by MeMed, AstraZeneca, AbbVie, and Janssen. The institute of Louis Bont received money for consultancy by Astra Zeneca, AbbVie, MedImmune, Janssen, Gilead and Novavax. Paul Checchia has acted as an expert advisor and speaker for AbbVie and has received honoraria in this regard. He has also received research grant funding from AstraZeneca. Brigitte Fauroux has received compensation as a neonatology board member from AbbVie. Josep Figueras-Aloy has acted as an expert advisor and speaker for AbbVie and has received honoraria in this regard. Paolo Manzoni has acted as a speaker for AbbVie, and as an expert advisor for AbbVie, TEVA, MedImmune, AstraZeneca, Janssen, and has received honoraria in this regard. Bosco Paes has received research funding from AbbVie Corporation and compensation as an advisor or lecturer from AbbVie and MedImmune. Eric Simões has received grant funding to his institution from MedImmune Inc, Glaxo Smith Kline Inc, and received consultancy fees to the institution, from AbbVie. Xavier Carbonell-Estrany has acted as an expert advisor and speaker for AbbVie and has received honoraria in this regard.

## Copyright

Copyright © The Authors 2018.

This slide deck is distributed under the terms of the Creative Commons Attribution Noncommercial License which permits any noncommercial use, distribution, and reproduction in any medium, provided the original author(s) and the source are credited.
